# Supplementary material for: Kinetics of contracting geometry-type reactions in the solid state: implications from the thermally induced transformation processes of α-oxalic acid dihydrate
Source: Royal Society of Chemistry journal article supplement (doi:10.1039/d0cp03176c), 2020-01-01
Supplement: d0cp03176c1.pdf [file d0cp03176c1.pdf]

# Kinetics of contracting geometry-type reactions in the solid state: Implications from the thermally induced transformation processes of $\alpha$ -oxalic acid dihydrate

Satoki Kodani and Nobuyoshi Koga\*

Department of Science Education, Graduate School of Education, Hiroshima University, 1-1-1 Kagamiyama, Higashi-Hiroshima 739-8524, Japan

## Contents

|                                                                                                                                                                                                                                                                                                                                                                                                                                                              |    |
|--------------------------------------------------------------------------------------------------------------------------------------------------------------------------------------------------------------------------------------------------------------------------------------------------------------------------------------------------------------------------------------------------------------------------------------------------------------|----|
| S1. Sample characterization.....                                                                                                                                                                                                                                                                                                                                                                                                                             | s2 |
| <b>Figure S1.</b> (a) XRD pattern and (b) FT-IR spectrum of the CPs sample.....                                                                                                                                                                                                                                                                                                                                                                              | s2 |
| <b>Table S1.</b> Assignments of IR absorption peaks.....                                                                                                                                                                                                                                                                                                                                                                                                     | s2 |
| <b>Figure S2.</b> Optical microscopic views of the samples: (a) CPs and (b) SC samples.....                                                                                                                                                                                                                                                                                                                                                                  | s2 |
| S2. Overall thermal behavior.....                                                                                                                                                                                                                                                                                                                                                                                                                            | s2 |
| <b>Figure S3.</b> (a) Changes in the XRD pattern of the CPs sample during a stepwise isothermal heating from room temperature to 353 K in steps of 5 K under a dynamic flow of dry N <sub>2</sub> gas and (b) the diffraction pattern of the product solid at 353 K.....                                                                                                                                                                                     | s2 |
| <b>Figure S4.</b> (a) Changes in the XRD pattern of the CPs sample during isothermal heating at 323 K under a dynamic flow of dry N <sub>2</sub> gas and (b) changes in the crystallite size of the solid product, i.e., $\alpha$ -oxalic acid anhydride, calculated with reference to (020) diffraction peak.....                                                                                                                                           | s2 |
| <b>Figure S5.</b> TG–DTG curves for the samples at various $\beta$ values under a dynamic flow of dry N <sub>2</sub> gas: (a) CPs ( $m_0 = 3.09 \pm 0.19$ mg) and (b) SC ( $m_0 = 3.32 \pm 0.17$ mg) samples.....                                                                                                                                                                                                                                            | s3 |
| <b>Figure S6.</b> Typical $T$ –TG–DTG records for the samples recorded using the CRTA mode at a $C$ of $15 \mu\text{g min}^{-1}$ under a dynamic flow of dry N <sub>2</sub> gas: (a) CPs ( $m_0 = 3.71$ mg) and (b) SC ( $m_0 = 2.55$ mg) samples.....                                                                                                                                                                                                       | s3 |
| S3. Thermal dehydration process.....                                                                                                                                                                                                                                                                                                                                                                                                                         | s3 |
| <b>Figure S7.</b> Typical TG–DTG curves for the thermal dehydration of the dihydrate to form anhydride recorded under isothermal conditions at various $T$ : (a) CPs ( $m_0 = 3.59 \pm 0.13$ mg) and (b) SC ( $m_0 = 3.11 \pm 0.28$ mg). Time zero was defined as the time at which the sample temperature reached to the programmed temperature for isothermal measurement.....                                                                             | s3 |
| <b>Figure S8.</b> Kinetic curves for the thermal dehydration recorded under linear nonisothermal conditions at various $\beta$ values: (a) CPs and (b) SC samples.....                                                                                                                                                                                                                                                                                       | s3 |
| <b>Figure S9.</b> Kinetic curves for the thermal dehydration recorded under CR conditions at various $C$ values: (a) CPs and (b) SC samples.....                                                                                                                                                                                                                                                                                                             | s4 |
| <b>Figure S10.</b> Kinetic curves for the thermal dehydration recorded under isothermal conditions at various $T$ values: (a) CPs and (b) SC samples.....                                                                                                                                                                                                                                                                                                    | 4  |
| <b>Figure S11.</b> Friedman plots for the mass-loss process of the thermal dehydration at various $\alpha_1$ from 0.1 to 0.9 in steps of 0.1: (a) CPs and (b) SC samples.....                                                                                                                                                                                                                                                                                | s4 |
| <b>Table S2.</b> Differential kinetic equations of the SR–PBR( $n$ ) models.....                                                                                                                                                                                                                                                                                                                                                                             | s5 |
| <b>Table S3.</b> Optimized $k_{SR}$ and $k_{PBR(2)}$ for the thermal dehydration of $\alpha$ -oxalic acid dihydrate at various temperatures.....                                                                                                                                                                                                                                                                                                             | s5 |
| S4. Sublimation/decomposition process.....                                                                                                                                                                                                                                                                                                                                                                                                                   | s6 |
| <b>Figure S12.</b> TG–DTG curves for the thermally induced sublimation/decomposition of the anhydrous oxalic acid produced by the thermal dehydration of the dihydrate, as recorded under isothermal conditions at various $T$ : (a) CPs ( $m_0 = 3.57 \pm 0.09$ mg) and (b) SC ( $m_0 = 2.98 \pm 0.12$ mg) samples. Time zero was defined as the time at which the sample temperature reached to the programmed temperature for isothermal measurement..... | s6 |
| <b>Figure S13.</b> Kinetic curves for the thermally induced sublimation/decomposition of the anhydrous oxalic acid produced by the thermal dehydration of the dihydrate recorded under linear nonisothermal conditions at various $\beta$ values: (a) CPs and (b) SC samples.....                                                                                                                                                                            | s6 |
| <b>Figure S14.</b> Kinetic curves for the thermally induced sublimation/decomposition of the anhydrous oxalic acid produced by the thermal dehydration of the dihydrate recorded under CR conditions at various $C$ values: (a) CPs and (b) SC samples.....                                                                                                                                                                                                  | s6 |
| <b>Figure S15.</b> Kinetic curves for the thermally induced sublimation/decomposition of the anhydrous oxalic acid produced by the thermal dehydration of the dihydrate recorded under isothermal conditions at various $T$ values: (a) CPs and (b) SC samples.....                                                                                                                                                                                          | s6 |
| <b>Figure S16.</b> Friedman plots for the mass-loss process of the thermally induced sublimation/decomposition of the anhydrous oxalic acid produced by the thermal dehydration of the dihydrate at various $\alpha_2$ from 0.1 to 0.9 in steps of 0.1: (a) CPs and (b) SC samples.....                                                                                                                                                                      | s7 |

\* Corresponding author. E-mail: nkoga@hiroshima-u.ac.jp

## S1. Sample characterization

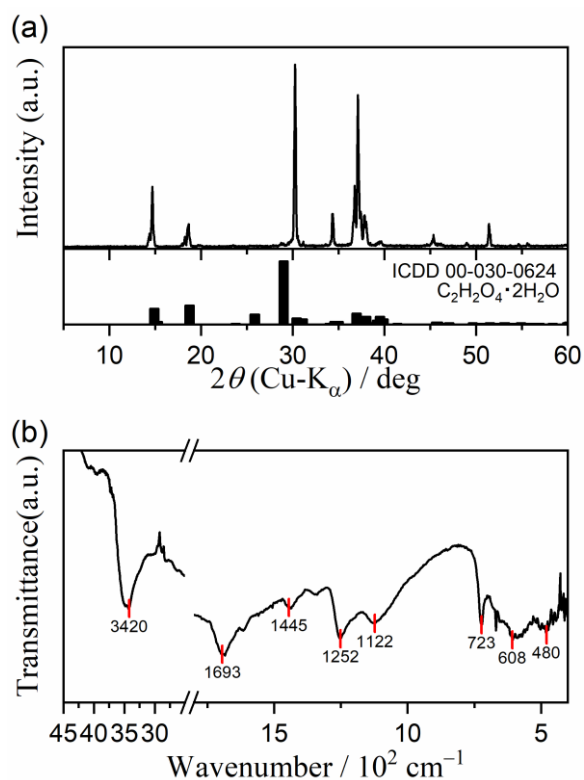

**Figure S1.** (a) XRD pattern and (b) FT-IR spectrum of the CPs sample.

**Table S1.** Assignments of IR absorption peaks<sup>38-40</sup>

| Peak/cm <sup>-1</sup> | Vibration mode                                              |
|-----------------------|-------------------------------------------------------------|
| 3420                  | OH stretching                                               |
| 1693                  | Stretching of the C=O moiety of the carboxyl groups         |
| 1445                  | H-O-H bending                                               |
| 1252                  | C-O stretching                                              |
| 1122                  | out-of-plane vibration of the hydroxyl group of oxalic acid |
| 723                   | Combination band                                            |
| 608                   | Out of plane vibration that involve five atoms              |
| 480                   | Combination band                                            |

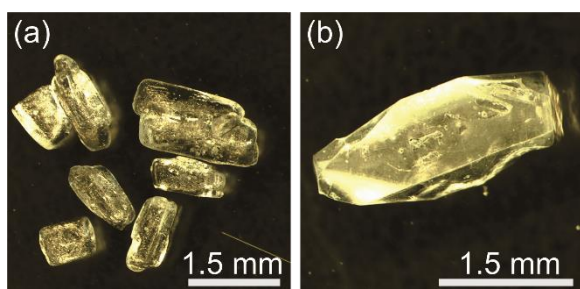

**Figure S2.** Optical microscopic views of the samples: (a) CPs and (b) SC samples.

## S2. Overall thermal behavior

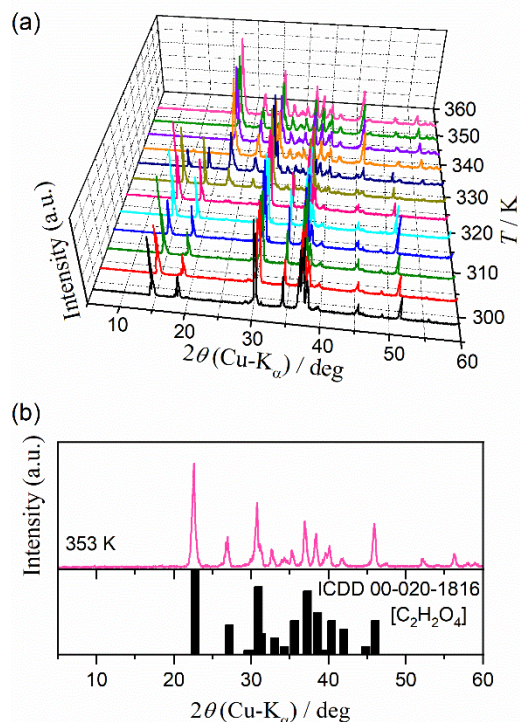

**Figure S3.** (a) Changes in the XRD pattern of the CPs sample during a stepwise isothermal heating from room temperature to 353 K in steps of 5 K under a dynamic flow of dry N<sub>2</sub> gas and (b) the diffraction pattern of the product solid at 353 K.

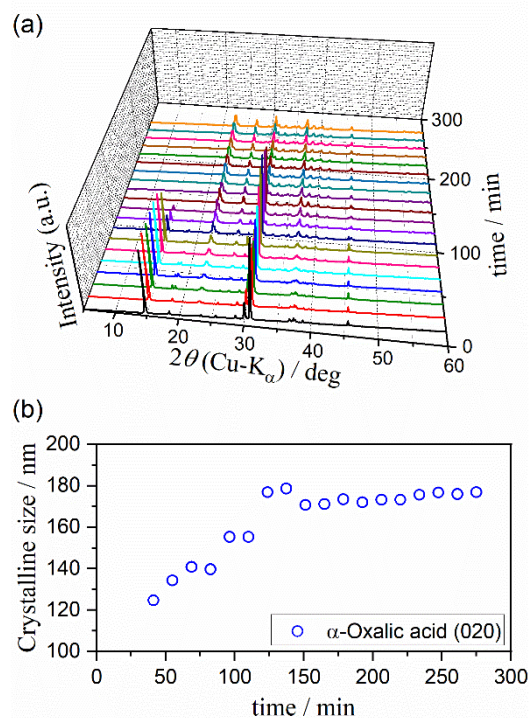

**Figure S4.** (a) Changes in the XRD pattern of the CPs sample during isothermal heating at 323 K under a dynamic flow of dry N<sub>2</sub> gas and (b) changes in the crystallite size of the solid product, i.e., α-oxalic acid anhydride, calculated with reference to (020) diffraction peak.

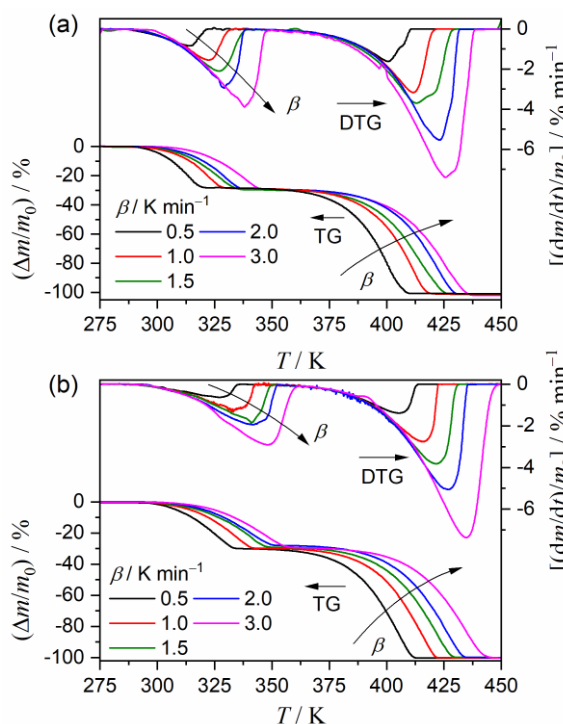

**Figure S5.** TG–DTG curves for the samples at various  $\beta$  values under a dynamic flow of dry  $\text{N}_2$  gas: (a) CPs ( $m_0 = 3.09 \pm 0.19$  mg) and (b) SC ( $m_0 = 3.32 \pm 0.17$  mg) samples.

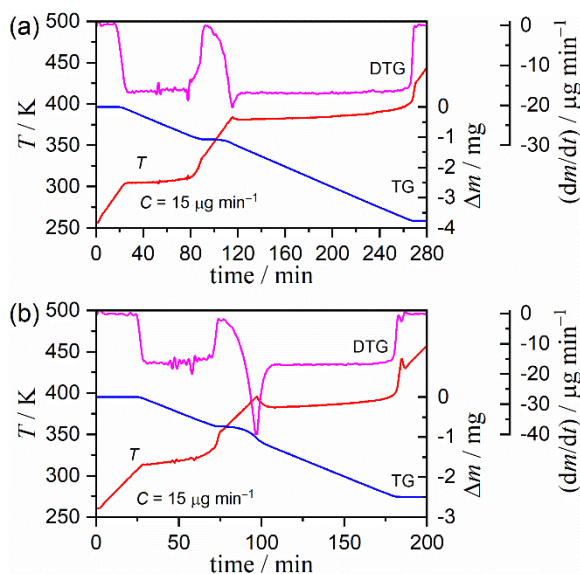

**Figure S6.** Typical  $T$ -TG–DTG records for the samples recorded using the CRTA mode at a  $C$  of  $15 \mu\text{g min}^{-1}$  under a dynamic flow of dry  $\text{N}_2$  gas: (a) CPs ( $m_0 = 3.71$  mg) and (b) SC ( $m_0 = 2.55$  mg) samples.

### S3. Thermal dehydration process

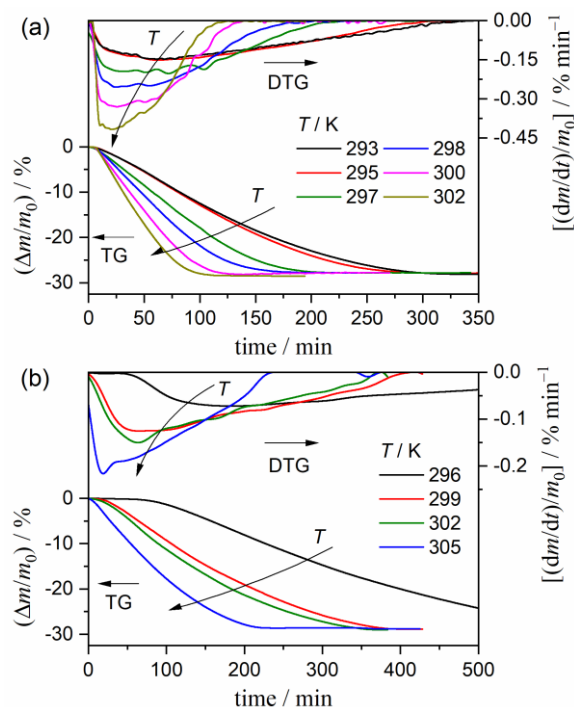

**Figure S7.** Typical TG–DTG curves for the thermal dehydration of the dihydrate to form anhydrite under isothermal conditions at various  $T$ : (a) CPs ( $m_0 = 3.59 \pm 0.13$  mg) and (b) SC ( $m_0 = 3.11 \pm 0.28$  mg). Time zero was defined as the time at which the sample temperature reached to the programmed temperature for isothermal measurement.

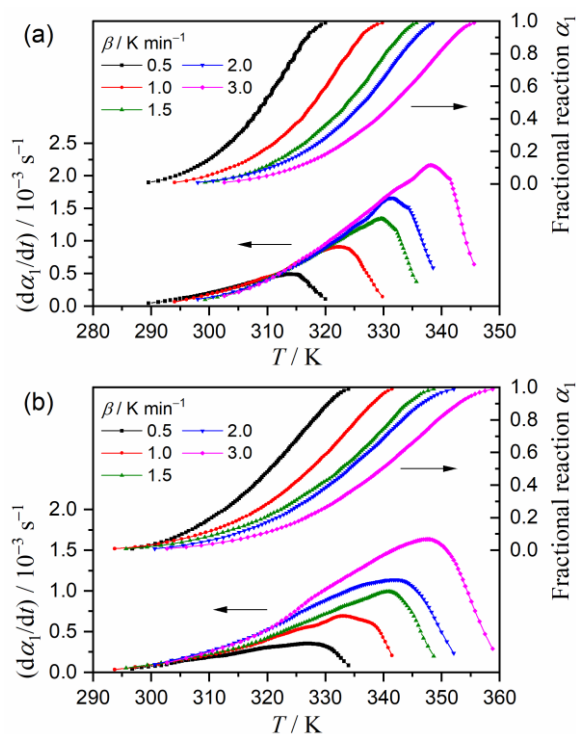

**Figure S8.** Kinetic curves for the thermal dehydration recorded under linear nonisothermal conditions at various  $\beta$  values: (a) CPs and (b) SC samples.

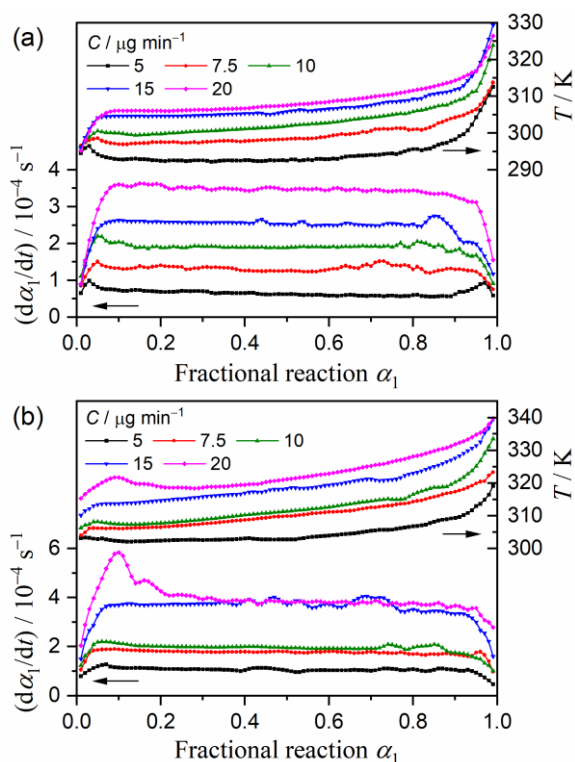

**Figure S9.** Kinetic curves for the thermal dehydration recorded under CR conditions at various  $C$  values: (a) CPs and (b) SC samples.

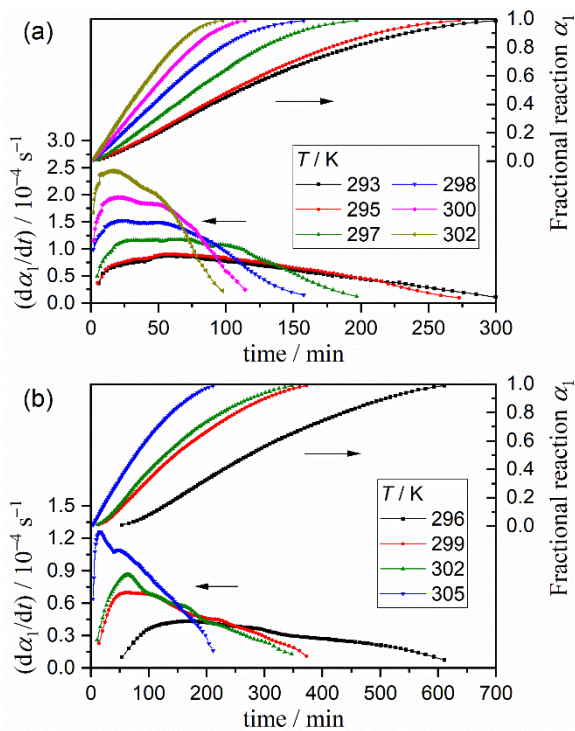

**Figure S10.** Kinetic curves for the thermal dehydration recorded under isothermal conditions at various  $T$  values: (a) CPs and (b) SC samples.

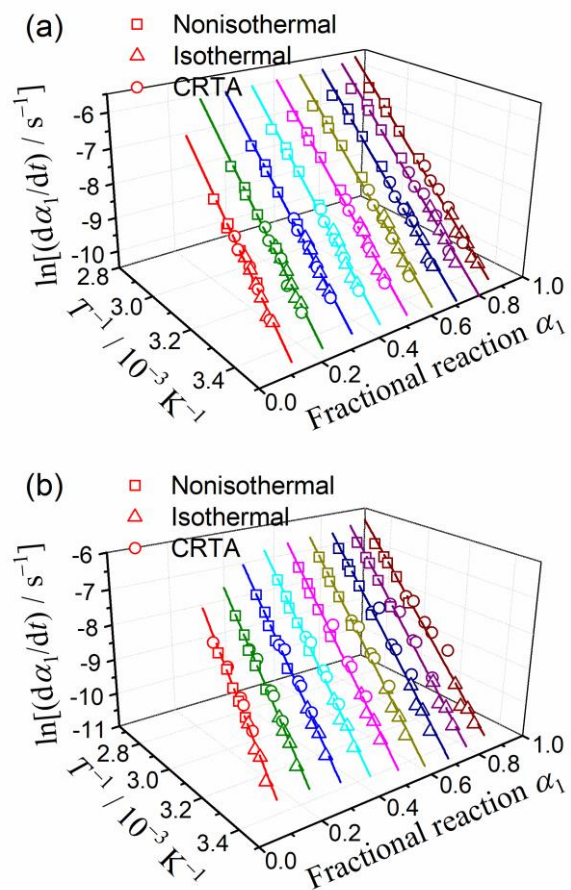

**Figure S11.** Friedman plots for the mass-loss process of the thermal dehydration at various  $\alpha_1$  from 0.1 to 0.9 in steps of 0.1: (a) CPs and (b) SC samples.

**Table S2.** Differential kinetic equations of the SR–PBR(*n*) models

| <i>n</i> | $\frac{d\alpha}{dt} =$                                                                                                                                                                                                                                                                                                                                                                                                                         |
|----------|------------------------------------------------------------------------------------------------------------------------------------------------------------------------------------------------------------------------------------------------------------------------------------------------------------------------------------------------------------------------------------------------------------------------------------------------|
| 1        | a) $t \leq 1/k_{\text{PBR}(1)}$ : $k_{\text{PBR}(1)}[1 - \exp(-k_{\text{SR}}t)]$                                                                                                                                                                                                                                                                                                                                                               |
|          | b) $t \geq 1/k_{\text{PBR}(1)}$ : $k_{\text{PBR}(1)}\exp(-k_{\text{SR}}t) \left[ \exp\left(\frac{k_{\text{SR}}}{k_{\text{PBR}(1)}}\right) - 1 \right]$                                                                                                                                                                                                                                                                                         |
| 2        | a) $t \leq 1/k_{\text{PBR}(2)}$ : $-2k_{\text{PBR}(2)} \left[ \left(1 + \frac{k_{\text{PBR}(2)}}{k_{\text{SR}}}\right) \exp(-k_{\text{SR}}t) + k_{\text{PBR}(2)}t - \left(1 + \frac{k_{\text{PBR}(2)}}{k_{\text{SR}}}\right) \right]$                                                                                                                                                                                                          |
|          | b) $t \geq 1/k_{\text{PBR}(2)}$ : $-2k_{\text{PBR}(2)}\exp(-k_{\text{SR}}t) \left[ 1 + \frac{k_{\text{PBR}(2)}}{k_{\text{SR}}} - \frac{k_{\text{PBR}(2)}}{k_{\text{SR}}}\exp\left(\frac{k_{\text{SR}}}{k_{\text{PBR}(2)}}\right) \right]$                                                                                                                                                                                                      |
| 3        | a) $t \leq 1/k_{\text{PBR}(3)}$ : $-3k_{\text{PBR}(3)} \left[ \left(1 + 2\frac{k_{\text{PBR}(3)}}{k_{\text{SR}}} + 2\left(\frac{k_{\text{PBR}(3)}}{k_{\text{SR}}}\right)^2\right) \exp(-k_{\text{SR}}t) - (-k_{\text{PBR}(3)}t)^2 + 2k_{\text{PBR}(3)}\left(\frac{k_{\text{PBR}(3)}}{k_{\text{SR}}} + 1\right)t - \left(1 + 2\frac{k_{\text{PBR}(3)}}{k_{\text{SR}}} + 2\left(\frac{k_{\text{PBR}(3)}}{k_{\text{SR}}}\right)^2\right) \right]$ |
|          | b) $t \geq 1/k_{\text{PBR}(3)}$ : $3k_{\text{PBR}(3)}\exp(-k_{\text{SR}}t) \left[ 2\left(\frac{k_{\text{PBR}(3)}}{k_{\text{SR}}}\right)^2 \left( \exp\left(\frac{k_{\text{SR}}}{k_{\text{PBR}(3)}}\right) - 1 \right) - \left(1 + 2\frac{k_{\text{PBR}(3)}}{k_{\text{SR}}}\right) \right]$                                                                                                                                                     |

**Table S3.** Optimized  $k_{\text{SR}}$  and  $k_{\text{PBR}(2)}$  for the thermal dehydration of  $\alpha$ -oxalic acid dihydrate at various temperatures

| Sample | <i>T</i> / K | $k_{\text{SR}} / \text{s}^{-1}$ | $k_{\text{PBR}(2)} / \text{s}^{-1}$ | $R^{2, \text{a}}$ |          |
|--------|--------------|---------------------------------|-------------------------------------|-------------------|----------|
|        |              |                                 |                                     | differential      | integral |
| CPs    | 292.8        | $7.92 \times 10^{-4}$           | $5.26 \times 10^{-5}$               | 0.9970            | 0.9998   |
|        | 294.7        | $6.88 \times 10^{-4}$           | $5.89 \times 10^{-5}$               | 0.9939            | 0.9997   |
|        | 296.8        | $1.01 \times 10^{-3}$           | $8.11 \times 10^{-5}$               | 0.9868            | 0.9990   |
|        | 298.4        | $1.19 \times 10^{-3}$           | $1.04 \times 10^{-4}$               | 0.9932            | 0.9998   |
|        | 300.5        | $1.35 \times 10^{-3}$           | $1.36 \times 10^{-4}$               | 0.9905            | 0.9989   |
|        | 300.9        | $1.15 \times 10^{-3}$           | $1.77 \times 10^{-4}$               | 0.9872            | 0.9957   |
| SC     | 296.1        | $3.43 \times 10^{-4}$           | $2.60 \times 10^{-5}$               | 0.9966            | 0.9992   |
|        | 299.0        | $1.03 \times 10^{-3}$           | $3.95 \times 10^{-5}$               | 0.9985            | 0.9993   |
|        | 302.0        | $1.48 \times 10^{-3}$           | $4.40 \times 10^{-5}$               | 0.9764            | 0.9990   |
|        | 305.0        | $5.82 \times 10^{-3}$           | $6.54 \times 10^{-5}$               | 0.9984            | 0.9991   |

<sup>a</sup> determination coefficient of the nonlinear least squares analysis.

## S4. Sublimation/decomposition process

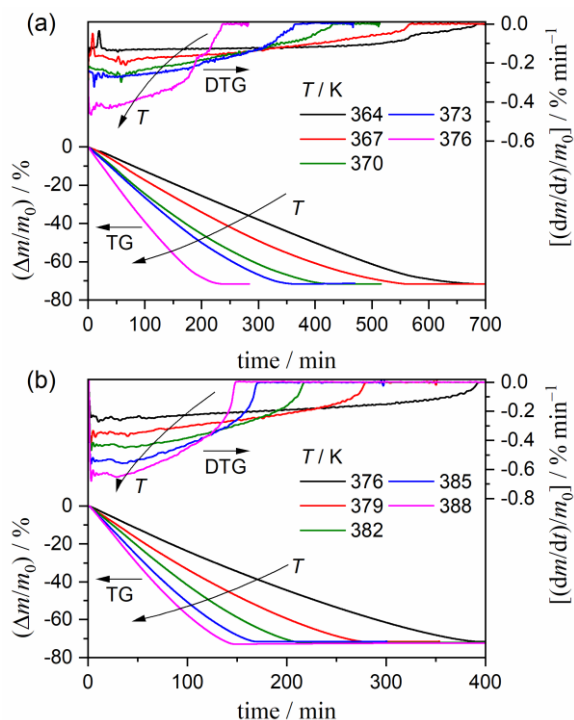

**Figure S12.** TG–DTG curves for the thermally induced sublimation/decomposition of the anhydrous oxalic acid produced by the thermal dehydration of the dihydrate, as recorded under isothermal conditions at various  $T$ : (a) CPs ( $m_0 = 3.57 \pm 0.09$  mg) and (b) SC ( $m_0 = 2.98 \pm 0.12$  mg) samples. Time zero was defined as the time at which the sample temperature reached to the programmed temperature for isothermal measurement.

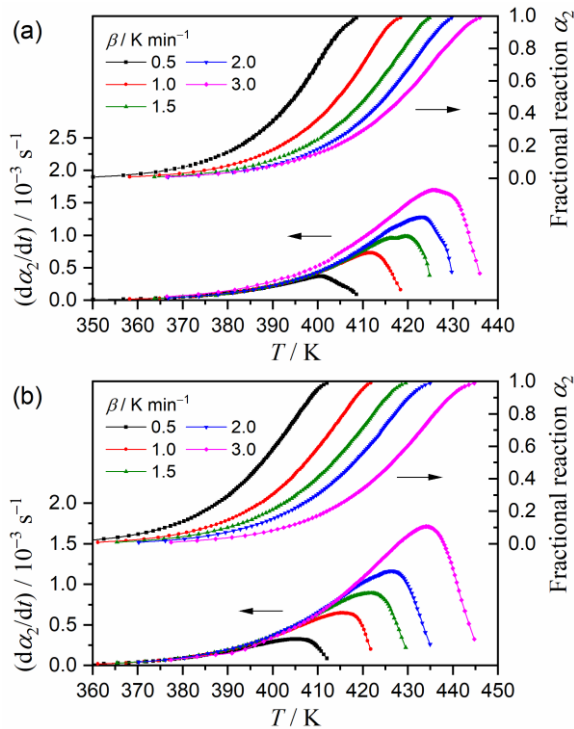

**Figure S13.** Kinetic curves for the thermally induced sublimation/decomposition of the anhydrous oxalic acid produced by the thermal dehydration of the dihydrate recorded under linear nonisothermal conditions at various  $\beta$  values: (a) CPs and (b) SC samples.

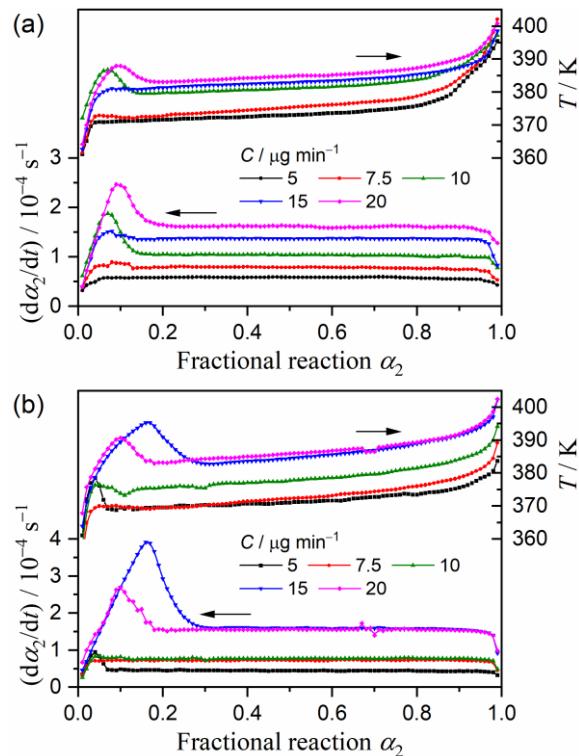

**Figure S14.** Kinetic curves for the thermally induced sublimation/decomposition of the anhydrous oxalic acid produced by the thermal dehydration of the dihydrate recorded under CR conditions at various  $C$  values: (a) CPs and (b) SC samples.

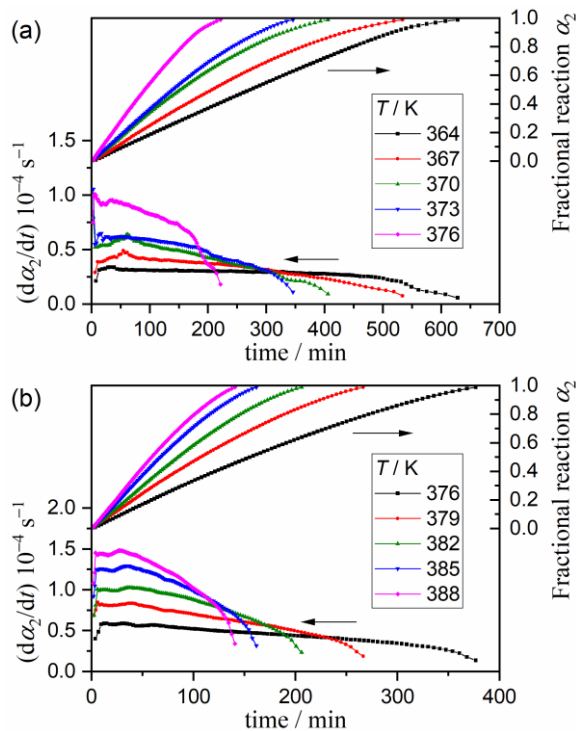

**Figure S15.** Kinetic curves for the thermally induced sublimation/decomposition of the anhydrous oxalic acid produced by the thermal dehydration of the dihydrate recorded under isothermal conditions at various  $T$  values: (a) CPs and (b) SC samples.

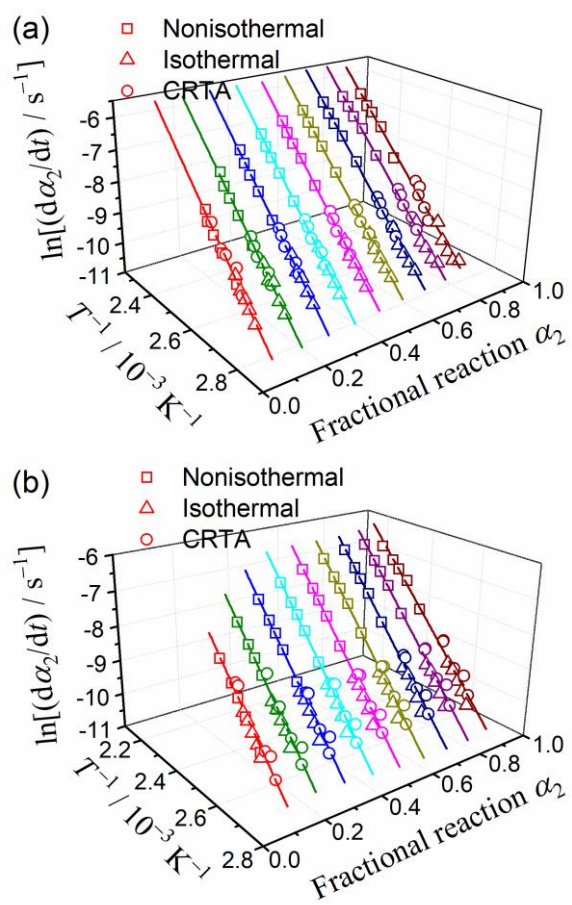

**Figure S16.** Friedman plots for the mass-loss process of the thermally induced sublimation/decomposition of the anhydrous oxalic acid produced by the thermal dehydration of the dihydrate at various  $\alpha_2$  from 0.1 to 0.9 in steps of 0.1: (a) CPs and (b) SC samples.
